# Supplementary material for: Non-invasive imaging of breast cancer using RGDyK functionalized fluorescent carbonaceous nanospheres
Source: Royal Society of Chemistry journal article supplement (doi:10.1039/c5ra00099h), 2015-01-01
Supplement: c5ra00099h1.pdf [file c5ra00099h1.pdf]

# Non-invasive imaging of breast cancer using RGDyK functionalized fluorescent carbonaceous nanospheres

Shaobo Ruan<sup>a,1</sup>, Jun Qian<sup>b,1</sup>, Shun Shen<sup>b</sup>, Jiantao Chen<sup>a</sup>, Xingli Cun<sup>a</sup>, Jianhua Zhu<sup>b</sup>, Xinguo Jiang<sup>b</sup>, Qin He<sup>a,\*</sup> and Huile Gao<sup>a,\*</sup>

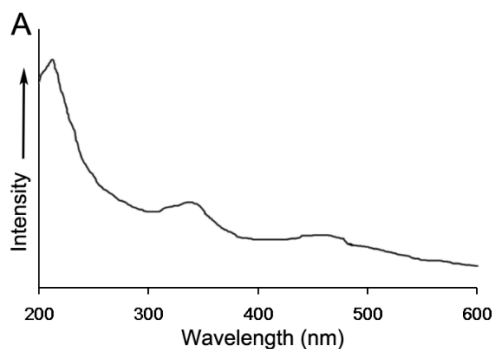

Figure S1: UV-vis spectrum of CD.

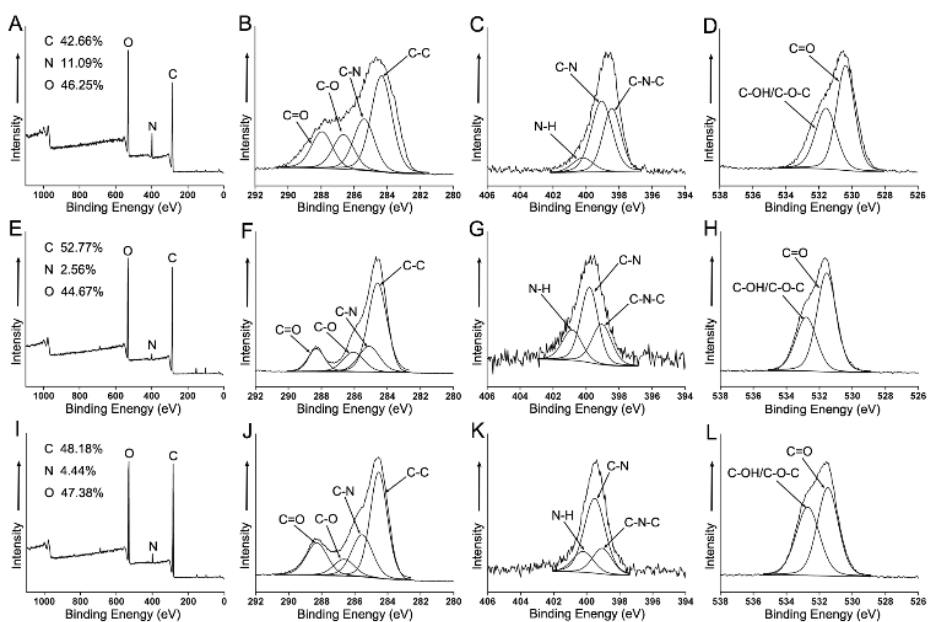

Figure S2. (A): XPS survey spectrum of CDs. (B): XPS C1s spectrum of CDs. (C): XPS N1s spectrum of CDs. (D): XPS O1s spectrum of CDs. (E): XPS survey spectrum of PEG-CDs. (F): XPS C1s spectrum of PEG-CDs. (G): XPS N1s spectrum of PEG-CDs. (H): XPS O1s spectrum of PEG-CDs. (I): XPS survey spectrum of RGD- PEG-CDs. (J): XPS C1s spectrum of RGD- PEG-CDs. (K): XPS N1s spectrum of RGD- PEG-CDs. (L): XPS O1s spectrum of RGD- PEG-CDs.
